# Supplementary material for: Shelters can negatively affect growth and welfare in lumpfish if feed is delivered continuously
Source: PeerJ. 2018 May 25;6:e4837. doi: 10.7717/peerj.4837 (PMC5971831; doi:10.7717/peerj.4837)
Supplement: Supplemental Information 1 — Data are presented in ’long’ format, with measurements before and after in the same column and distinguished by a second column specifying whether the data point is before or after the trial. Weight is given in grams and length and height are given in centimetres. [file peerj-06-4837-s004.xlsx]

## Sheet: lumpfish shelter and feeding
time	fish	tank	weight	length	height	fins	enrichment	feed
before	1	1	4.54	4	2.1	2	shelter	hand
before	2	1	4.72	4.1	2.1	2	shelter	hand
before	3	1	5.21	4.2	2.1	2	shelter	hand
before	4	1	5.19	4.1	2.1	2	shelter	hand
before	5	1	4.2	3.9	1.9	1	shelter	hand
before	6	1	4.4	4	1.9	2	shelter	hand
before	7	1	4.28	4	1.9	2	shelter	hand
before	8	1	3.64	3.7	1.6	1	shelter	hand
before	9	1	4.38	3.8	1.9	2	shelter	hand
before	10	1	4.61	4	1.9	2	shelter	hand
before	11	2	2.88	3.6	1.7	2	bare	feeder
before	12	2	4.25	4	1.8	2	bare	feeder
before	13	2	3.57	3.6	1.9	2	bare	feeder
before	14	2	4.52	4.1	2	2	bare	feeder
before	15	2	4.22	4.1	1.9	2	bare	feeder
before	16	2	4.25	3.9	2	2	bare	feeder
before	17	2	3.65	3.5	1.9	2	bare	feeder
before	18	2	2.93	3.4	1.6	2	bare	feeder
before	19	2	3.74	3.7	1.8	2	bare	feeder
before	20	2	4.92	4.4	2	2	bare	feeder
before	21	3	3.59	3.7	1.7	2	shelter	feeder
before	22	3	3.36	3.7	1.9	2	shelter	feeder
before	23	3	2.4	3.3	1.4	1	shelter	feeder
before	24	3	2.27	3.4	1.5	2	shelter	feeder
before	25	3	2.54	3.4	1.5	2	shelter	feeder
before	26	3	5.2	4.4	2.1	2	shelter	feeder
before	27	3	4.14	3.9	1.9	1	shelter	feeder
before	28	3	3.19	3.6	1.7	2	shelter	feeder
before	29	3	2.75	3.5	1.6	2	shelter	feeder
before	30	3	3.14	3.5	1.8	2	shelter	feeder
before	31	4	5.95	4.4	2.2	2	bare	hand
before	32	4	4.18	3.9	2	2	bare	hand
before	33	4	3.6	3.8	1.8	2	bare	hand
before	34	4	3.01	3.5	1.8	2	bare	hand
before	35	4	2.74	3.4	1.7	2	bare	hand
before	36	4	2.92	3.6	1.7	2	bare	hand
before	37	4	3.75	4	1.8	2	bare	hand
before	38	4	3.37	3.8	1.8	3	bare	hand
before	39	4	4.12	3.9	2	2	bare	hand
before	40	4	3.36	3.8	1.9	2	bare	hand
before	41	5	4.18	3.7	1.9	1	shelter	feeder
before	42	5	4.66	3.9	2.1	2	shelter	feeder
before	43	5	2.6	3.2	1.4	2	shelter	feeder
before	44	5	4.03	3.8	1.7	2	shelter	feeder
before	45	5	2.3	3	1.3	2	shelter	feeder
before	46	5	4.99	4	1.9	2	shelter	feeder
before	47	5	2.76	3.2	1.5	2	shelter	feeder
before	48	5	4.59	4	1.9	2	shelter	feeder
before	49	5	3.24	3.6	1.5	2	shelter	feeder
before	50	5	4.1	3.8	1.7	2	shelter	feeder
before	51	6	4.14	3.8	1.7	2	shelter	feeder
before	52	6	3.29	3.5	1.7	1	shelter	feeder
before	53	6	3.6	3.5	1.6	2	shelter	feeder
before	54	6	5.1	4	2	1	shelter	feeder
before	55	6	4.14	3.7	1.7	2	shelter	feeder
before	56	6	3.26	3.5	1.6	2	shelter	feeder
before	57	6	4.4	4	1.8	2	shelter	feeder
before	58	6	5.13	4.1	1.9	2	shelter	feeder
before	59	6	4.45	3.9	1.8	2	shelter	feeder
before	60	6	3.12	3.3	1.5	2	shelter	feeder
before	61	7	2.47	3.3	1.4	2	shelter	hand
before	62	7	2.63	3.3	1.5	2	shelter	hand
before	63	7	3	3.6	1.5	1	shelter	hand
before	64	7	2.9	3.4	1.5	2	shelter	hand
before	65	7	3.04	3.6	1.6	2	shelter	hand
before	66	7	5.51	3.9	2	2	shelter	hand
before	67	7	2.4	3.1	1.4	2	shelter	hand
before	68	7	4.65	3.9	1.9	2	shelter	hand
before	69	7	4	3.8	1.8	2	shelter	hand
before	70	7	2.49	3.3	1.4	1	shelter	hand
before	71	8	2.37	3.1	1.4	2	bare	feeder
before	72	8	4.33	4	1.8	2	bare	feeder
before	73	8	3.43	3.6	1.6	2	bare	feeder
before	74	8	3.7	3.7	1.7	2	bare	feeder
before	75	8	4.36	3.8	1.8	2	bare	feeder
before	76	8	4.8	4	2	2	bare	feeder
before	77	8	2.4	3.2	1.4	1	bare	feeder
before	78	8	4.11	3.8	1.9	2	bare	feeder
before	79	8	3.34	3.3	1.6	2	bare	feeder
before	80	8	2.51	3.3	1.4	2	bare	feeder
before	81	9	3.43	3.6	1.7	2	bare	hand
before	82	9	3.1	3.3	1.3	2	bare	hand
before	83	9	3.53	3.6	1.6	2	bare	hand
before	84	9	3.13	3.5	1.6	2	bare	hand
before	85	9	3.32	3.4	1.7	2	bare	hand
before	86	9	2.52	3.3	1.6	2	bare	hand
before	87	9	4.47	3.8	1.8	2	bare	hand
before	88	9	3.46	3.6	1.6	2	bare	hand
before	89	9	3.43	3.5	1.6	1	bare	hand
before	90	9	3.59	3.6	1.6	2	bare	hand
before	91	10	3.33	3.3	1.7	2	shelter	hand
before	92	10	4.7	3.9	2	1	shelter	hand
before	93	10	3.39	3.3	1.7	2	shelter	hand
before	94	10	3.11	3.5	1.7	2	shelter	hand
before	95	10	4.96	4.1	1.9	1	shelter	hand
before	96	10	4.33	3.8	1.8	2	shelter	hand
before	97	10	2.76	3.5	1.5	2	shelter	hand
before	98	10	4.02	3.7	1.8	2	shelter	hand
before	99	10	4.72	3.8	1.9	2	shelter	hand
before	100	10	2.78	3.3	1.5	1	shelter	hand
before	101	11	3.75	3.7	1.8	2	bare	hand
before	102	11	5.39	4.1	2	2	bare	hand
before	103	11	4.64	3.9	1.9	1	bare	hand
before	104	11	3.39	3.7	1.7	2	bare	hand
before	105	11	2.21	3.1	1.3	2	bare	hand
before	106	11	3.19	3.5	1.6	2	bare	hand
before	107	11	4.29	3.7	1.9	2	bare	hand
before	108	11	5.92	4.4	2.1	2	bare	hand
before	109	11	2.97	3.6	1.6	2	bare	hand
before	110	11	3.17	3.6	1.6	2	bare	hand
before	111	12	3	3.5	1.6	2	bare	feeder
before	112	12	5.53	4.2	2	2	bare	feeder
before	113	12	4.68	3.8	1.8	2	bare	feeder
before	114	12	4.6	3.9	2	2	bare	feeder
before	115	12	4.68	4.1	1.9	2	bare	feeder
before	116	12	3.44	3.6	1.7	2	bare	feeder
before	117	12	3.29	3.5	1.6	2	bare	feeder
before	118	12	4.73	4	1.9	2	bare	feeder
before	119	12	2.94	3.5	1.6	2	bare	feeder
before	120	12	4.4	4	1.9	2	bare	feeder
before	121	13	4.43	3.7	1.8	2	shelter	hand
before	122	13	3.4	3.6	1.7	2	shelter	hand
before	123	13	3.55	3.8	1.7	2	shelter	hand
before	124	13	2.62	3.3	1.4	2	shelter	hand
before	125	13	3.6	3.7	1.7	2	shelter	hand
before	126	13	2.68	3.3	1.4	2	shelter	hand
before	127	13	3.1	3.5	1.6	2	shelter	hand
before	128	13	2.93	3.5	1.5	1	shelter	hand
before	129	13	3.87	3.7	1.8	1	shelter	hand
before	130	13	2.24	3.1	1.4	2	shelter	hand
before	131	14	3.58	3.6	1.7	2	shelter	hand
before	132	14	4.45	3.8	1.9	2	shelter	hand
before	133	14	2.52	3.2	1.5	2	shelter	hand
before	134	14	2.82	3.5	1.5	2	shelter	hand
before	135	14	3.1	3.5	1.5	2	shelter	hand
before	136	14	4.29	3.9	1.8	2	shelter	hand
before	137	14	3.26	3.7	1.7	1	shelter	hand
before	138	14	3.72	3.7	1.7	2	shelter	hand
before	139	14	3.86	3.6	1.8	2	shelter	hand
before	140	15	2.45	3.3	1.3	1	bare	feeder
before	141	15	4.16	3.8	1.8	2	bare	feeder
before	142	15	2.6	3.4	1.5	2	bare	feeder
before	143	15	3.23	3.6	1.7	3	bare	feeder
before	144	15	5.05	4.3	2	2	bare	feeder
before	145	15	3.49	3.7	1.7	2	bare	feeder
before	146	15	3.04	3.4	1.5	2	bare	feeder
before	147	15	3.7	3.7	1.7	2	bare	feeder
before	148	15	3	3.5	1.5	2	bare	feeder
before	149	15	2.54	3.2	1.5	2	bare	feeder
before	150	16	5.12	4.1	1.9	2	bare	feeder
before	151	16	4.03	3.7	1.8	2	bare	feeder
before	152	16	3.32	3.5	1.7	2	bare	feeder
before	153	16	5.12	3.9	1.9	2	bare	feeder
before	154	16	3.89	3.7	1.8	2	bare	feeder
before	155	16	2.55	3.3	1.4	2	bare	feeder
before	156	16	2.76	3.4	1.5	2	bare	feeder
before	157	16	3	3.4	1.6	2	bare	feeder
before	158	16	3.83	3.7	1.8	2	bare	feeder
before	159	16	3.28	3.6	1.8	2	bare	feeder
before	160	17	3.58	3.7	1.6	1	bare	hand
before	161	17	2.58	3.3	1.5	2	bare	hand
before	162	17	3.06	3.5	1.5	2	bare	hand
before	163	17	2.97	3.5	1.7	2	bare	hand
before	164	17	4.12	3.9	1.7	2	bare	hand
before	165	17	3.27	3.6	1.6	2	bare	hand
before	166	17	3.21	3.6	1.7	1	bare	hand
before	167	17	2.75	3.5	1.5	2	bare	hand
before	168	17	3.94	3.9	1.8	2	bare	hand
before	169	17	4.48	3.8	1.9	2	bare	hand
before	170	18	3.06	3.6	1.7	2	shelter	feeder
before	171	18	2.61	3.3	1.5	2	shelter	feeder
before	172	18	3.83	3.7	1.4	2	shelter	feeder
before	173	18	3.14	3.6	1.6	2	shelter	feeder
before	174	18	3.88	3.7	1.8	2	shelter	feeder
before	175	18	2.68	3.3	1.5	1	shelter	feeder
before	176	18	3.18	3.6	1.6	2	shelter	feeder
before	177	18	2.43	3.2	1.4	2	shelter	feeder
before	178	18	3.83	3.6	1.7	2	shelter	feeder
before	179	18	3.66	3.6	1.6	1	shelter	feeder
before	180	19	4.27	3.8	1.6	2	bare	hand
before	181	19	3.41	3.5	1.7	1	bare	hand
before	182	19	3.26	3.6	1.7	2	bare	hand
before	183	19	3.03	3.5	1.5	2	bare	hand
before	184	19	5.02	4.1	2	1	bare	hand
before	185	19	3.78	3.9	1.8	2	bare	hand
before	186	19	2.8	3.3	1.5	2	bare	hand
before	187	19	2.85	3.5	1.6	2	bare	hand
before	188	19	2.82	3.3	1.5	2	bare	hand
before	189	19	2.8	3.4	1.7	2	bare	hand
before	190	20	2.76	3.3	1.5	2	shelter	feeder
before	191	20	2.7	3.5	1.6	2	shelter	feeder
before	192	20	3.78	3.6	1.7	2	shelter	feeder
before	193	20	3.19	3.5	1.6	2	shelter	feeder
before	194	20	3.05	3.5	1.5	2	shelter	feeder
before	195	20	3.07	3.6	1.6	2	shelter	feeder
before	196	20	3.07	3.8	1.6	2	shelter	feeder
before	197	20	3.25	3.6	1.6	2	shelter	feeder
before	198	20	2.59	3.5	1.5	2	shelter	feeder
before	199	20	3.41	3.5	1.7	1	shelter	feeder
after	1	1	10.77	5.3	2.6	2	shelter	hand
after	2	1	9.2	4.7	2.4	2	shelter	hand
after	3	1	12.33	5.5	2.7	1	shelter	hand
after	4	1	13.18	5.4	2.8	2	shelter	hand
after	5	1	11.63	5.4	2.6	1	shelter	hand
after	6	1	12.18	5.4	2.7	2	shelter	hand
after	7	1	9.91	5.1	2.4	2	shelter	hand
after	8	1	9.16	4.8	2.4	1	shelter	hand
after	9	1	10.25	5.2	2.8	2	shelter	hand
after	10	1	12.01	5.5	2.6	2	shelter	hand
after	11	2	7.27	4.5	2.2	2	bare	feeder
after	12	2	10.92	5.3	2.5	2	bare	feeder
after	13	2	6.18	4.2	2.1	2	bare	feeder
after	14	2	13.68	5.7	2.9	1	bare	feeder
after	15	2	11.04	5.3	2.5	2	bare	feeder
after	16	2	9.56	4.9	2.5	2	bare	feeder
after	17	2	8.07	4.5	2.4	2	bare	feeder
after	18	2	8.42	4.5	2.3	2	bare	feeder
after	19	2	8.33	4.7	2.3	2	bare	feeder
after	20	2	13.64	5.7	2.7	1	bare	feeder
after	21	3	9.5	4.9	2.5	2	shelter	feeder
after	22	3	6.29	4.4	2.1	2	shelter	feeder
after	23	3	2.77	3.3	1.5	1	shelter	feeder
after	24	3	5.14	3.9	1.9	2	shelter	feeder
after	25	3	5.75	4.1	2	2	shelter	feeder
after	26	3	11.54	5.5	2.6	2	shelter	feeder
after	27	3	6.12	4.4	2.1	1	shelter	feeder
after	28	3	7.82	4.9	2.3	2	shelter	feeder
after	29	3	7.48	4.8	2.3	2	shelter	feeder
after	30	3	4.88	3.9	2	2	shelter	feeder
after	31	4	13.9	5.5	2.8	2	bare	hand
after	32	4	11.98	5.2	2.7	1	bare	hand
after	33	4	8.89	4.8	2.3	2	bare	hand
after	34	4	5.14	4.1	2	2	bare	hand
after	35	4	7.82	4.6	2.3	1	bare	hand
after	36	4	8.19	4.8	2.3	2	bare	hand
after	37	4	10.52	5	2.5	2	bare	hand
after	38	4	8.4	4.8	2.3	2	bare	hand
after	39	4	11.11	5.2	2.6	2	bare	hand
after	40	4	8.02	4.5	2.3	2	bare	hand
after	41	5	11.34	5.3	2.8	2	shelter	feeder
after	42	5	8.19	4.8	2.3	2	shelter	feeder
after	43	5	5.32	4.1	1.9	1	shelter	feeder
after	44	5	6.69	4.6	2.2	2	shelter	feeder
after	45	5	4.23	3.8	1.8	2	shelter	feeder
after	46	5	13.25	5.6	2.8	2	shelter	feeder
after	47	5	4.22	3.9	1.8	2	shelter	feeder
after	48	5	10.62	5.4	2.5	2	shelter	feeder
after	49	5	8.73	4.8	2.4	2	shelter	feeder
after	50	5	8.43	4.8	2.3	2	shelter	feeder
after	51	6	5.72	4.3	2.1	2	shelter	feeder
after	52	6	6.83	4.6	2.2	1	shelter	feeder
after	53	6	6.82	4.5	2.2	2	shelter	feeder
after	54	6	10.65	5	2.6	1	shelter	feeder
after	55	6	8.45	4.9	2.3	2	shelter	feeder
after	56	6	5.93	4.3	2.1	2	shelter	feeder
after	57	6	10.12	5.2	2.5	2	shelter	feeder
after	58	6	13.02	5.5	2.8	2	shelter	feeder
after	59	6	10.52	5.5	2.5	2	shelter	feeder
after	60	6	5.48	4.4	2	2	shelter	feeder
after	61	7	5.58	4.1	1.9	2	shelter	hand
after	62	7	6.41	4.4	2.2	2	shelter	hand
after	63	7	6.76	4.7	2.2	1	shelter	hand
after	64	7	6.45	4.5	2.1	1	shelter	hand
after	65	7	7.95	4.8	2.3	2	shelter	hand
after	66	7	15.54	5.8	3.1	2	shelter	hand
after	67	7	7.17	4.4	2.2	1	shelter	hand
after	68	7	11.15	5.4	2.6	1	shelter	hand
after	69	7	7.38	4.5	2.3	2	shelter	hand
after	70	7	4.53	4	1.8	2	shelter	hand
after	71	8	5.78	4.1	2.1	2	bare	feeder
after	72	8	10.44	5.1	2.7	2	bare	feeder
after	73	8	7.97	4.7	2.3	2	bare	feeder
after	74	8	10	5.2	2.6	1	bare	feeder
after	75	8	8.57	5	2.4	2	bare	feeder
after	76	8	12.23	5.3	2.7	2	bare	feeder
after	77	8	2.57	3.4	1.5	1	bare	feeder
after	78	8	7.22	4.4	2.2	2	bare	feeder
after	79	8	9.12	4.9	2.5	2	bare	feeder
after	80	8	7.2	4.5	2.2	2	bare	feeder
after	81	9	8.3	4.8	2.4	2	bare	hand
after	82	9	8.54	4.5	2.4	2	bare	hand
after	83	9	8.85	4.8	2.4	2	bare	hand
after	84	9	7.5	4.5	2.3	1	bare	hand
after	85	9	6.62	4.4	2.2	2	bare	hand
after	86	9	5.78	4.3	2.2	2	bare	hand
after	87	9	10.35	5	2.6	2	bare	hand
after	88	9	8.62	4.9	2.3	2	bare	hand
after	89	9	9.16	4.8	2.5	1	bare	hand
after	90	9	10.33	5	2.6	2	bare	hand
after	91	10	8.83	5.1	2.4	2	shelter	hand
after	92	10	13.6	5.5	2.8	1	shelter	hand
after	93	10	9.08	5.1	2.4	2	shelter	hand
after	94	10	8.53	4.9	2.4	2	shelter	hand
after	95	10	13.65	5.6	2.8	1	shelter	hand
after	96	10	10.54	5.2	2.6	2	shelter	hand
after	97	10	5.64	4.3	2	2	shelter	hand
after	98	10	11	5.5	2.6	2	shelter	hand
after	99	10	9.41	4.7	2.5	2	shelter	hand
after	100	10	8.51	4.8	2.4	2	shelter	hand
after	101	11	7.89	4.6	2.3	1	bare	hand
after	102	11	12.88	5.7	2.7	2	bare	hand
after	103	11	12.15	5.4	2.7	1	bare	hand
after	104	11	9.71	5.2	2.4	2	bare	hand
after	105	11	3	2.9	1.6	4	bare	hand
after	106	11	6.62	4.5	2.1	2	bare	hand
after	107	11	7.83	4.5	2.3	2	bare	hand
after	108	11	12.39	5.4	2.7	2	bare	hand
after	109	11	8.4	4.9	2.3	2	bare	hand
after	110	11	7.2	4.5	2.2	2	bare	hand
after	111	12	8.06	4.6	2.3	2	bare	feeder
after	112	12	8.46	4.9	2.4	1	bare	feeder
after	113	12	10.25	5.6	2.6	2	bare	feeder
after	114	12	10.76	5.1	2.6	2	bare	feeder
after	115	12	9.19	5.1	2.4	2	bare	feeder
after	116	12	7.75	4.8	2.2	2	bare	feeder
after	117	12	8.26	4.8	2.3	2	bare	feeder
after	118	12	13.95	5.7	2.9	1	bare	feeder
after	119	12	5.63	4.2	2	2	bare	feeder
after	120	12	11.9	5.5	2.7	2	bare	feeder
after	121	13	11.2	5.5	2.7	2	shelter	hand
after	122	13	9.11	4.8	2.4	2	shelter	hand
after	123	13	8.33	4.9	2.4	2	shelter	hand
after	124	13	5.93	4.4	2.1	2	shelter	hand
after	125	13	10.96	5.4	2.7	2	shelter	hand
after	126	13	6.09	4.5	2	1	shelter	hand
after	127	13	7.2	4.8	2.3	2	shelter	hand
after	128	13	6.36	4.6	2	1	shelter	hand
after	129	13	10.35	5	2.7	2	shelter	hand
after	130	13	6.07	4.5	2.2	2	shelter	hand
after	131	14	8.55	5	2.3	2	shelter	hand
after	132	14	13.99	5.4	2.9	2	shelter	hand
after	133	14	5.35	4.3	1.9	2	shelter	hand
after	134	14	7.46	4.9	2.3	2	shelter	hand
after	135	14	7.62	4.5	2.3	2	shelter	hand
after	136	14	11.22	5.4	2.6	2	shelter	hand
after	137	14	9.21	5.3	2.4	2	shelter	hand
after	138	14	7.87	4.9	2.4	1	shelter	hand
after	139	14	7.1	4.6	2.3	2	shelter	hand
after	140	15	6.55	4.4	2.1	1	bare	feeder
after	141	15	9.76	5.2	2.6	1	bare	feeder
after	142	15	7.08	4.6	2.2	1	bare	feeder
after	143	15	8.82	4.9	2.5	2	bare	feeder
after	144	15	11.59	5.5	2.6	1	bare	feeder
after	145	15	6.68	4.6	2.1	2	bare	feeder
after	146	15	8.04	4.6	2.3	2	bare	feeder
after	147	15	9.74	5.1	2.5	2	bare	feeder
after	148	15	9.79	5.2	2.5	2	bare	feeder
after	149	15	4.86	3.9	1.9	1	bare	feeder
after	150	16	15.31	5.9	3	1	bare	feeder
after	151	16	9.91	5.2	2.5	1	bare	feeder
after	152	16	6.54	4.4	2.2	1	bare	feeder
after	153	16	11.43	5.1	2.7	2	bare	feeder
after	154	16	9.88	5.1	2.5	2	bare	feeder
after	155	16	3.87	3.8	1.8	1	bare	feeder
after	156	16	5.4	4.4	2	1	bare	feeder
after	157	16	7.52	4.6	2.2	2	bare	feeder
after	158	16	4.4	3.9	1.9	1	bare	feeder
after	159	16	7.61	4.7	2.2	2	bare	feeder
after	160	17	10.16	4.9	2.5	1	bare	hand
after	161	17	5.77	4.5	2.1	1	bare	hand
after	162	17	10.03	5.2	2.5	1	bare	hand
after	163	17	7.57	4.7	2.2	1	bare	hand
after	164	17	9.2	5.1	2.4	1	bare	hand
after	165	17	8.63	4.7	2.3	2	bare	hand
after	166	17	9.26	5	2.4	1	bare	hand
after	167	17	6.59	4.4	2.2	2	bare	hand
after	168	17	10.77	5.5	2.5	2	bare	hand
after	169	17	10.9	5.1	2.6	1	bare	hand
after	170	18	7.15	4.8	2.2	2	shelter	feeder
after	171	18	5.71	4.1	2	2	shelter	feeder
after	172	18	6.12	4.5	2.2	2	shelter	feeder
after	173	18	6.65	4.6	2.1	1	shelter	feeder
after	174	18	8.71	5	2.5	2	shelter	feeder
after	175	18	5.62	4.2	1.9	1	shelter	feeder
after	176	18	6.08	4.3	2	1	shelter	feeder
after	177	18	5.02	4.1	1.9	2	shelter	feeder
after	178	18	6.89	4.5	2.3	2	shelter	feeder
after	179	18	8.64	4.9	2.4	1	shelter	feeder
after	180	19	12.19	5.4	2.8	1	bare	hand
after	181	19	7.62	4.5	2.2	1	bare	hand
after	182	19	6.72	4.6	2.1	2	bare	hand
after	183	19	8.82	4.9	2.4	1	bare	hand
after	184	19	13.94	5.6	2.9	1	bare	hand
after	185	19	6.36	4.5	2.2	2	bare	hand
after	186	19	8.39	4.6	2.4	2	bare	hand
after	187	19	7.18	4.6	2.2	1	bare	hand
after	188	19	6.5	4.5	2.1	1	bare	hand
after	189	19	7.52	4.5	2.3	1	bare	hand
after	190	20	6.44	4.4	2.1	1	shelter	feeder
after	191	20	5.98	4.7	2	1	shelter	feeder
after	192	20	7.95	4.8	2.4	2	shelter	feeder
after	193	20	7.49	4.6	2.2	2	shelter	feeder
after	194	20	6.64	4.4	2.1	1	shelter	feeder
after	195	20	7.31	4.8	2.3	2	shelter	feeder
after	196	20	6.57	4.6	2.1	2	shelter	feeder
after	197	20	4.53	4.1	1.9	2	shelter	feeder
after	198	20	2.96	3.7	1.6	2	shelter	feeder
after	199	20	7.64	4.5	2.2	1	shelter	feeder
